# Supplementary material for: Metabolic modification of Sphingobium lignivorans SYK-6 for lignin valorization through the discovery of an unusual transcriptional repressor of lignin-derived dimer catabolism
Source: Royal Society of Chemistry journal article supplement (doi:10.1039/d4gc05328a), 2025-01-01
Supplement: d4gc05328a1.pdf [file d4gc05328a1.pdf]

**TABLE S1.** Strains and plasmids used in this study

| Strains and Plasmids     | Relevant characteristic(s) <sup>a</sup>                                                                                                                                         | Reference or source |
|--------------------------|---------------------------------------------------------------------------------------------------------------------------------------------------------------------------------|---------------------|
| <i>Sphingobium</i>       |                                                                                                                                                                                 |                     |
| <i>lignivorans</i> SYK-6 | Wild type; Nal <sup>r</sup> Sm <sup>r</sup>                                                                                                                                     | 1                   |
| $\Delta$ ligS            | SYK-6 derivative; $\Delta$ ligS; Nal <sup>r</sup> Sm <sup>r</sup>                                                                                                               | This study          |
| $\Delta$ ligL            | SYK-6 derivative; $\Delta$ ligL; Nal <sup>r</sup> Sm <sup>r</sup>                                                                                                               | 2                   |
| $\Delta$ ligLN           | $\Delta$ ligL derivative; $\Delta$ ligL ligN; Nal <sup>r</sup> Sm <sup>r</sup>                                                                                                  | 2                   |
| $\Delta$ ligDLN          | $\Delta$ ligLN derivative; $\Delta$ ligD ligL ligN; Nal <sup>r</sup> Sm <sup>r</sup>                                                                                            | This study          |
| $\Delta$ ligI            | SYK-6 derivative; $\Delta$ ligI; Nal <sup>r</sup> Sm <sup>r</sup>                                                                                                               | 3                   |
| $\Delta$ ligI ligS       | $\Delta$ ligI derivative; $\Delta$ ligI ligS; Nal <sup>r</sup> Sm <sup>r</sup>                                                                                                  | This study          |
| <i>Escherichia coli</i>  |                                                                                                                                                                                 |                     |
| BL21(DE3)                | F <sup>-</sup> ompT hsdS <sub>B</sub> (r <sub>B</sub> <sup>-</sup> m <sub>B</sub> <sup>-</sup> ) gal dcm (DE3); T7 RNA polymerase gene under the control of the lacUV5 promoter | 4                   |
| HB101                    | recA13 supE44 hsd20 ara-14 proA2 lacY1 galk2 rpsL20 xyl-5 mtl-1                                                                                                                 | 5                   |
| NEB 10-beta              | araD 139 $\Delta$ (ara-leu)7697 fhuA lacX74 galK ( $\phi$ 80 $\Delta$ lacZ $\Delta$ M15) recA1 endA1 nupG rpsL (Sm <sup>r</sup> ) $\Delta$ (mrr-hsdRMS-mcrBC)                   | New England Biolabs |
| Plasmid                  |                                                                                                                                                                                 |                     |
| pRK2013                  | Tra <sup>+</sup> Mob <sup>+</sup> ColE1 replicon; Km <sup>r</sup>                                                                                                               | 6                   |
| pSEVA225                 | RK2 cloning vector, Km <sup>r</sup>                                                                                                                                             | SEVA                |
| pET-16b                  | Expression vector; T7 promoter, Ap <sup>r</sup>                                                                                                                                 | Novagen             |
| pMAL-cX5                 | pMB1 ori cloning vector; Taq promoter, lacI, male, Ap <sup>r</sup>                                                                                                              | New England Biolabs |
| pAK405                   | Plasmid for allelic exchange and markerless gene deletions in Sphingomonads; Km <sup>r</sup>                                                                                    | 7                   |
| pAK405GFP                | pAK405 with synthesized promoter and codon-optimized superfolder GFP gene                                                                                                       | 8                   |
| pJB861                   | RK2 broad-host-range expression vector; P <sub>m</sub> xylS; Km <sup>r</sup>                                                                                                    | 9                   |
| pD1                      | pSEVA225 with a PCR amplified fragment of -269 to +30 relative to the ligD start codon                                                                                          | This study          |
| pD2                      | pSEVA225 with a PCR amplified fragment of -173 to +30 relative to the ligD start codon                                                                                          | This study          |
| pD3                      | pSEVA225 with a PCR amplified fragment of -108 to +30 relative to the ligD start codon                                                                                          | This study          |
| pD2m35                   | pD2 with the mutation at TRM site (TTGA to CCAG) in ligD promoter                                                                                                               | This study          |
| pD2m2                    | pD2 with the mutation at LigS binding site (TGT to CAC) in ligD promoter                                                                                                        | This study          |
| pD2m3                    | pD2 with the mutation at LigS binding site (GGAAATG to AGGGATA) in ligD promoter                                                                                                | This study          |
| pL1                      | pSEVA225 with a PCR amplified fragment of -119 to +30 relative to the ligL start codon                                                                                          | This study          |
| pL2                      | pSEVA225 with a PCR amplified fragment of -64 to +30 relative to the ligL start codon                                                                                           | This study          |
| pL1m35                   | pL1 with the mutation at TRM site (TTGA to CCAG) in ligL promoter                                                                                                               | This study          |
| pL1m2                    | pL1 with the mutation at LigS binding site (TGT to CAC) in ligL promoter                                                                                                        | This study          |
| pL1m3                    | pL1 with the mutation at LigS binding site (GGAACGG to AGGGCGA) in ligL promoter                                                                                                | This study          |
| pP1                      | pSEVA225 with a PCR amplified fragment of -116 to +27 relative to the ligP start codon                                                                                          | This study          |
| pP2                      | pSEVA225 with a PCR amplified fragment of -75 to +27 relative to the ligP start codon                                                                                           | This study          |
| pP1m35                   | pP1 with the mutation at TRM site (TCGATG to CCAGTC) in ligP promoter                                                                                                           | This study          |
| pP1m1                    | pP1 with the mutation at LigS binding site (TTGA to CCAG) in ligP promoter                                                                                                      | This study          |
| pP1m2                    | pP1 with the mutation at LigS binding site (TGT to CAC) in ligP promoter                                                                                                        | This study          |
| pP1m3                    | pP1 with the mutation at LigS binding site (GGAAACG to AGGGACA) in ligP promoter                                                                                                | This study          |
| pZ1                      | pSEVA225 with a PCR amplified fragment of -173 to +30 relative to the hpvZ start codon                                                                                          | This study          |
| pZ2                      | pSEVA225 with a PCR amplified fragment of -108 to +30 relative to the hpvZ start codon                                                                                          | This study          |
| pZ3                      | pSEVA225 with a PCR amplified fragment of -62 to +30 relative to the hpvZ start codon                                                                                           | This study          |
| pZ2m35                   | pZ2 with the mutation at TRM site (TTGA to CCAG) in hpvZ promoter                                                                                                               | This study          |
| pZ2m2                    | pZ2 with the mutation at LigS binding site (TGT to CAC) in hpvZ promoter                                                                                                        | This study          |
| pZ2m3                    | pZ2 with the mutation at LigS binding site (GAAAAAG to AAAGGAA) in hpvZ promoter                                                                                                | This study          |
| pA1                      | pSEVA225 with a PCR amplified fragment of -71 to +19 relative to the ldpA start codon                                                                                           | This study          |
| pA2                      | pSEVA225 with a PCR amplified fragment of -26 to +19 relative to the ldpA start codon                                                                                           | This study          |
| pETligS                  | pET-16b with a 1.6 kb PCR amplified deletion fragment of ligS                                                                                                                   | This study          |
| pETdTetR                 | pET-16b with a 0.6 kb PCR amplified deletion fragment of dTetR                                                                                                                  | This study          |

|                    |                                                                        |            |
|--------------------|------------------------------------------------------------------------|------------|
| pMAL <i>ligS</i>   | pMAL-cX5 with a 1.6 kb PCR amplified deletion fragment of <i>ligS</i>  | This study |
| pMALdTetR          | pMAL-cX5 with a 0.6 kb PCR amplified deletion fragment of dTetR        | This study |
| pMALdMarR          | pMAL-cX5 with a 1.0 kb PCR amplified deletion fragment of dMarR        | This study |
| pAK <i>ligD</i>    | pAK405 with a 2.3 kb PCR amplified deletion fragment of <i>ligD</i>    | 2          |
| pAK <i>ligS</i>    | pAK405GFP with a 2.0 kb PCR amplified deletion fragment of <i>ligS</i> | This study |
| pJB <i>ligS</i>    | pJB861 with a 1.6-kb BamHI fragment carrying <i>ligS</i>               | This study |
| pJBMBP <i>ligS</i> | pJB861 with a 2.8-kb BamHI fragment carrying MBP <i>ligS</i>           | This study |
| pJBMBPdMarR        | pJB861 with a 2.2-kb BamHI fragment carrying MBPdMarR                  | This study |

<sup>a</sup>Nal<sup>r</sup>, Sm<sup>r</sup>, Ap<sup>r</sup>, and Km<sup>r</sup> indicate resistance to nalidixic acid, streptomycin, ampicillin, and kanamycin, respectively.

**TABLE S2. Primers used in this study**

| Purpose                                                      | primer                                                    | sequences (5'to 3')                                        |
|--------------------------------------------------------------|-----------------------------------------------------------|------------------------------------------------------------|
| For the construction of a plasmid for <i>ligS</i> disruption | pAK <i>ligS</i>                                           |                                                            |
|                                                              | <i>disligS_topF</i>                                       | AGCTCGGTACCCGGGTGTTGCCCTATCCCGAGTTC                        |
|                                                              | <i>disligS_topR</i>                                       | GATTTTCTACTCCCGGCTCG                                       |
|                                                              | <i>disligS_botF</i>                                       | CGAGCCGGGAGTAGAAAATCGCTTTCGCGGTGCGATTGCG                   |
|                                                              | <i>disligS_botR</i>                                       | AGGTCGACTCTAGAGTGCCTGATAGAATGAGGCGA                        |
| For the construction of reporter plasmid                     | pD1                                                       |                                                            |
|                                                              | <i>pD1_F</i>                                              | ACCTGCAGGCATGCAGAGCGGAGATGACGGCGTCC                        |
|                                                              | <i>pD_R</i>                                               | TCATATGTTTTTCTCCTAGAACGCGACCTGATCCTGGAAATC                 |
|                                                              | pD2                                                       |                                                            |
|                                                              | <i>pD2_F</i>                                              | ACCTGCAGGCATGCAGTCGATCGCGCGGGGCGTCC                        |
|                                                              | <i>pD_R</i>                                               | TCATATGTTTTTCTCCTAGAACGCGACCTGATCCTGGAAATC                 |
|                                                              | pD3                                                       |                                                            |
|                                                              | <i>pD3_F</i>                                              | ACCTGCAGGCATGCAGCAGATGGCGCGGGCAGTCC                        |
|                                                              | <i>pD_R</i>                                               | TCATATGTTTTTCTCCTAGAACGCGACCTGATCCTGGAAATC                 |
|                                                              | pD2m35                                                    |                                                            |
|                                                              | <i>pD2m35_topF</i>                                        | ACCTGCAGGCATGCAGTCGATCGCGCGGGGCGTCCGGTCTTTGCCAGCATTGT      |
|                                                              | <i>pD2m35_topR</i>                                        | CTTGAAGCGGGTTTCCACTCATTCCGGACAATGCTGG                      |
|                                                              | <i>pD2m35_botF</i>                                        | GAGTGGAAACCCGCTCAAG                                        |
|                                                              | <i>pD_R</i>                                               | TCATATGTTTTTCTCCTAGAACGCGACCTGATCCTGGAAATC                 |
|                                                              | pD2m2                                                     |                                                            |
|                                                              | <i>pD2m2_topF</i>                                         | ACCTGCAGGCATGCAGTCGATCGCGCGGGGCGTCCGGTCTTTGTTGACATCAC      |
|                                                              | <i>pD2m2_topR</i>                                         | CTTGAAGCGGGTTTCCACTCATTCCGGGTGG                            |
|                                                              | <i>pD2m2_botF</i>                                         | GAGTGGAAACCCGCTCAAG                                        |
|                                                              | <i>pD_R</i>                                               | TCATATGTTTTTCTCCTAGAACGCGACCTGATCCTGGAAATC                 |
|                                                              | pD2m3                                                     |                                                            |
|                                                              | <i>pD2m3_topF</i>                                         | ACCTGCAGGCATGCAGTCGATCGCGCGGGGCGTCCGGTCTTTGTTGACATTGTTAAGG |
|                                                              | <i>pD2m3_topR</i>                                         | CTTGAAGCGGGTTTCCACTCATCTTAA                                |
|                                                              | <i>pD2m3_botF</i>                                         | GAGTGGAAACCCGCTCAAG                                        |
|                                                              | <i>pD_R</i>                                               | TCATATGTTTTTCTCCTAGAACGCGACCTGATCCTGGAAATC                 |
| pL1                                                          |                                                           |                                                            |
| <i>pL1_F</i>                                                 | ACCTGCAGGCATGCAGGGACTGACTGCGGATCAGG                       |                                                            |
| <i>pL_R</i>                                                  | TCATATGTTTTTCTCCTAGATGAACGCCGTGGTCCCTG                    |                                                            |
| pL2                                                          |                                                           |                                                            |
| <i>pL2_F</i>                                                 | ACCTGCAGGCATGCAGTGCAACGATCATGGGCTTC                       |                                                            |
| <i>pL_R</i>                                                  | TCATATGTTTTTCTCCTAGATGAACGCCGTGGTCCCTG                    |                                                            |
| pL1m35                                                       |                                                           |                                                            |
| <i>pL1m35_topF</i>                                           | ACCTGCAGGCATGCAGGGACTGACTGCGGATCAGGCATACGCCAGTTTGT        |                                                            |
| <i>pL1m35_topR</i>                                           | GGCTTATGCGCCGTTCCGGACAAAATGGCGTATG                        |                                                            |
| <i>pL1m35_botF</i>                                           | TCCGGAACGGCGCATAAGCC                                      |                                                            |
| <i>pL_R</i>                                                  | TCATATGTTTTTCTCCTAGATGAACGCCGTGGTCCCTG                    |                                                            |
| pL1m2                                                        |                                                           |                                                            |
| <i>pL1m2_topF</i>                                            | ACCTGCAGGCATGCAGGGACTGACTGCGGATCAGGCATACGTTGATTTTAC       |                                                            |
| <i>pL1m2_topR</i>                                            | GGCTTATGCGCCGTTCCGGTGAATCAAC                              |                                                            |
| <i>pL1m2_botF</i>                                            | TCCGGAACGGCGCATAAGCC                                      |                                                            |
| <i>pL_R</i>                                                  | TCATATGTTTTTCTCCTAGATGAACGCCGTGGTCCCTG                    |                                                            |
| pL1m3                                                        |                                                           |                                                            |
| <i>pL1m3_topF</i>                                            | ACCTGCAGGCATGCAGGGACTGACTGCGGATCAGGCATACGTTGATTTTGTAAAGG  |                                                            |
| <i>pL1m3_topR</i>                                            | GGCTTATGCGCCGCTTAAA                                       |                                                            |
| <i>pL1m3_botF</i>                                            | TCCGGAACGGCGCATAAGCC                                      |                                                            |
| <i>pL_R</i>                                                  | TCATATGTTTTTCTCCTAGATGAACGCCGTGGTCCCTG                    |                                                            |
| pP1                                                          |                                                           |                                                            |
| <i>pP1_F</i>                                                 | ACCTGCAGGCATGCACCGCTCGTTTCCAGACATTA                       |                                                            |
| <i>pP_R</i>                                                  | TCATATGTTTTTCTCCTAGATGGTGATCTTGTGTCTT                     |                                                            |
| pP2                                                          |                                                           |                                                            |
| <i>pP2_F</i>                                                 | ACCTGCAGGCATGCAGCCAAAATCAACTAGCACTG                       |                                                            |
| <i>pP_R</i>                                                  | TCATATGTTTTTCTCCTAGATGGTGATCTTGTGTCTT                     |                                                            |
| pP1m35                                                       |                                                           |                                                            |
| <i>pP1_F</i>                                                 | ACCTGCAGGCATGCACCGCTCGTTTCCAGACATTA                       |                                                            |
| <i>pP1m35_topR</i>                                           | CATTCGTTCCCGGATCGTTG                                      |                                                            |
| <i>pP1m35_mid</i>                                            | CAACGATCCGGGAACGAATGGCCAAAATCAATCGATGCTGACCGCCGGTTGCGCTTA |                                                            |
| <i>pP1m35_mid</i>                                            | TAAGCGCAACCGCGGTGATCGATTGATTTGGCCATTCGTTCCCGGATCGTTG      |                                                            |
| <i>pP1m35_botF</i>                                           | CTGACCGCCGGTTGCGCTTA                                      |                                                            |

|                                               |                    |                                                         |
|-----------------------------------------------|--------------------|---------------------------------------------------------|
|                                               | pP_R               | TCATATGTTTTTCCTCCTAGATGGTGATCTTGTTGTCTT                 |
| pP1m1                                         | pP1m1_topF         | ACCTGCAGGCATGCACCGCTCGTTTCCAGACATTACTGG                 |
|                                               | pP1m1_topR         | CAGTGCTAGTTGATTTTGGCCATTTCGTTCCCGGATCGCCAGTAA           |
|                                               | pP1m1_botF         | GCCAAAATCAACTAGCACTG                                    |
|                                               | pP_R               | TCATATGTTTTTCCTCCTAGATGGTGATCTTGTTGTCTT                 |
| pP1m2                                         | pP1m2_topF         | ACCTGCAGGCATGCACCGCTCGTTTCCAGGTGTATCAA                  |
|                                               | pP1m2_topR         | CAGTGCTAGTTGATTTTGGCCATTTCGTTCCCGGATCGTTGATAACACCTG     |
|                                               | pP1m2_botF         | GCCAAAATCAACTAGCACTG                                    |
|                                               | pP_R               | TCATATGTTTTTCCTCCTAGATGGTGATCTTGTTGTCTT                 |
| pP1m3                                         | pP1m3_topF         | ACCTGCAGGCATGCACCGCTCGTCTTAAACATTA                      |
|                                               | pP1m3_topR         | CAGTGCTAGTTGATTTTGGCCATTTCGTTCCCGGATCGTTGATAATGTTTAAAGG |
|                                               | pP1m3_botF         | GCCAAAATCAACTAGCACTG                                    |
|                                               | pP_R               | TCATATGTTTTTCCTCCTAGATGGTGATCTTGTTGTCTT                 |
| pZ1                                           | pZ1_F              | ACCTGCAGGCATGCAAGGACGAGGGGCTGAAGCTC                     |
|                                               | pZ_R               | TCATATGTTTTTCCTCCTACACATAGTCGACCGTTCTG                  |
| pZ2                                           | pZ2_F              | ACCTGCAGGCATGCAGCGATCCTCTGGTTGACTTTG                    |
|                                               | pZ_R               | TCATATGTTTTTCCTCCTACACATAGTCGACCGTTCTG                  |
| pZ3                                           | pZ3_F              | ACCTGCAGGCATGCACCGATGGAGTCAATGCAGCG                     |
|                                               | pZ_R               | TCATATGTTTTTCCTCCTACACATAGTCGACCGTTCTG                  |
| pZ2m35                                        | pZ2m35_topF        | ACCTGCAGGCATGCAGCGATCCTCTGGCCAGCTTTGT                   |
|                                               | pZ2m35_topR        | CCGCTACAAGGCGGTCTTTTTCGAACAAAGCTGGC                     |
|                                               | pZ2m35_botF        | AAAAGACCGCCTTGTAGCGG                                    |
|                                               | pZ_R               | TCATATGTTTTTCCTCCTACACATAGTCGACCGTTCTG                  |
| pZ2m2                                         | pZ2m2_topF         | ACCTGCAGGCATGCAGCGATCCTCTGGTTGACTTCAC                   |
|                                               | pZ2m2_topR         | CCGCTACAAGGCGGTCTTTTTCGAGTGGAG                          |
|                                               | pZ2m2_botF         | AAAAGACCGCCTTGTAGCGG                                    |
|                                               | pZ_R               | TCATATGTTTTTCCTCCTACACATAGTCGACCGTTCTG                  |
| pZ2m3                                         | pZ2m3_topF         | ACCTGCAGGCATGCAGCGATCCTCTGGTTGACTTTGTTTAAAGG            |
|                                               | pZ2m3_topR         | CCGCTACAAGGCGGTCTTCCTTAA                                |
|                                               | pZ2m3_botF         | AAAAGACCGCCTTGTAGCGG                                    |
|                                               | pZ_R               | TCATATGTTTTTCCTCCTACACATAGTCGACCGTTCTG                  |
| pA1                                           | pA1_F              | ACCTGCAGGCATGCAATGGCGTTTCTCTCGAT                        |
|                                               | pA_R               | TCATATGTTTTTCCTCCTAGCGTTTCCACATCAGCCATT                 |
| pA2                                           | pA2_F              | ACCTGCAGGCATGCATTGCAGACAAGGAGAGAG                       |
|                                               | pA_R               | TCATATGTTTTTCCTCCTAGCGTTTCCACATCAGCCATT                 |
| For the construction of expression plasmid    |                    |                                                         |
| pET <i>ligS</i>                               | pET <i>ligS</i> _F | TCGAAGGTCGTCATATGACGGGCGGAAAGGCCGT                      |
|                                               | pET <i>ligS</i> _R | GTTAGCAGCCGGATCCTCAGTCCCAGTCCATCTCCT                    |
| pETdTetR                                      | pETdTetR_F         | TCGAAGGTCGTCATATGACGGGCGGAAAGGCCGT                      |
|                                               | pETdTetR_R         | GTTAGCAGCCGGATCTCACTGGAAGCGACGCAGCCGGT                  |
| pMAL <i>ligS</i>                              | pM <i>ligS</i> _F  | ATCGAGGGAAGGATTTACATATGACGGGCGGAAAGGCCGT                |
|                                               | pM <i>ligS</i> _R  | GAGCCTTTCGTTTTATTGATCAGTCCCGGTCCATCTCCT                 |
| pMALdTetR                                     | pMdTetR_F          | ATCGAGGGAAGGATTTACATATGACGGGCGGAAAGGCCGT                |
|                                               | pMdTetR_R          | GAGCCTTTCGTTTTATTGATCACTGGAAGCGACGCAGCCGGT              |
| pMALdMarR                                     | pMdMarR_F          | ATCGAGGGAAGGATTTACATATGTCAAGCCTCTGGGTGTT                |
|                                               | pMdMarR_R          | GAGCCTTTCGTTTTATTGATCAGTCCCGGTCCATCTCCT                 |
| For the construction of complementary plasmid |                    |                                                         |
| pJB <i>ligS</i>                               | pJB <i>ligS</i> _F | ATGGGAAGCTTCGTGAAAGGAGGTATATATAATGACGGGCGGAAAGGCCGT     |
|                                               | pJB <i>ligS</i> _R | TCCTGCAGGATATCTGTCAGTCCCAGTCCATCTCC                     |
| pJBMBP <i>ligS</i>                            | pJBMBP_F           | ATGGGAAGCTTCGTGAAAGGAGGTATATATAATGAAAATCGAAGAAGGTAA     |
|                                               | pJB <i>ligS</i> _R | TCCTGCAGGATATCTGTCAGTCCCAGTCCATCTCC                     |
| pJBMBPdMarR                                   | pJBMBP_F           | ATGGGAAGCTTCGTGAAAGGAGGTATATATAATGAAAATCGAAGAAGGTAA     |
|                                               | pJB <i>ligS</i> _R | TCCTGCAGGATATCTGTCAGTCCCAGTCCATCTCC                     |

---

For confirmation of  
gene disruption

|              |                      |                      |
|--------------|----------------------|----------------------|
| <i>ΔligD</i> | <i>disligD_confF</i> | GCCTCATCTATGAACTGAAT |
|              | <i>disligD_confR</i> | CTCGAACAGCATGGGGCGAT |
| <i>ΔligS</i> | <i>disligS_confF</i> | GGAGAAATATGGCAATACCG |
|              | <i>disligS_confR</i> | CAATCGCGCCGCGACTGTTC |

For RT-PCR

|                     |                      |                       |
|---------------------|----------------------|-----------------------|
| RT0863- <i>ligD</i> | 0863- <i>ligD</i> _F | CGCAGCACGGCAACAACAAT  |
|                     | 0863- <i>ligD</i> _R | CATCATAAGTGGTCTTCTCG  |
| RT <i>ligD-ligF</i> | <i>ligD-ligF</i> _F  | CGAGAAGACCACTTATGATG  |
|                     | <i>ligD-ligF</i> _R  | AGATATTCGAGATCACCGT   |
| RT <i>ligF-ligE</i> | <i>ligF-ligE</i> _F  | ACGGTGATCTGCGAATATCT  |
|                     | <i>ligF-ligE</i> _R  | AGGATATAGCAGCGGAACCA  |
| RT <i>ligF-ligG</i> | <i>ligE-ligG</i> _F  | TGGTTCCGCTGCTATATCCT  |
|                     | <i>ligE-ligG</i> _R  | CAGGATGACCATGCTTTCCT  |
| RT <i>ligG-0868</i> | <i>ligG-0868</i> _F  | AGGAAAGCATGGTCATCCTG  |
|                     | <i>ligG-0868</i> _R  | GCCATCACGAGGATATTGTC  |
| RT1263- <i>ldpB</i> | 1263- <i>ldpB</i> _F | CCTTCAGCAGATCGACAAGC  |
|                     | 1263- <i>ldpB</i> _R | ACATCTACGAAACCAGCCTC  |
| RT <i>ldpA-1266</i> | <i>ldpA-1266</i> _F  | TGGTTCCAGAATCGCTTAC   |
|                     | <i>ldpA-1266</i> _R  | GATATAATCTTCCGCCACCC  |
| RT1266-1267         | 1266-1267_F          | GGGTGGCGGAAGATTATATC  |
|                     | 1266-1267_R          | TCCAATGCTCCACGATCTT   |
| RT1267-1268         | 1267-1268_F          | AAGATCGTGGAGCATTGGGA  |
|                     | 1267-1268_R          | TCGATGAACACATTGTCCTT  |
| RT1268- <i>ldpC</i> | 1268- <i>ldpC</i> _F | AAGGACAATGTGTTCATCGA  |
|                     | 1268- <i>ldpC</i> _R | TTCATCGCCATGCCTCGCTT  |
| RT <i>ldpC-1270</i> | <i>ldpC-1270</i> _F  | AAGCGAGGCATGGCGATGAA  |
|                     | <i>ldpC-1270</i> _R  | TCCTCGGCGGAGATATCCGC  |
| RT1280-1282         | 1280-1282_F          | CGCCACCATGTTCCGG      |
|                     | 1280-1282_R          | GCGGCAGTGAGAACA       |
| RT1282- <i>hvpZ</i> | 1282- <i>hvpZ</i> _F | CGTCACCTTCGGCAT       |
|                     | 1282- <i>hvpZ</i> _R | CTTCCACCGCACCT        |
| RT3257-3258         | 3257-3258_F          | CCCAGGCATCCAAGCTCGAT  |
|                     | 3257-3258_R          | ACTTCCTGGTTCAGCCAAA   |
| RT3258-3259         | 3258-3259_F          | CTGAGCTTCACGTACAAGGG  |
|                     | 3258-3259_R          | CACCTGCACGGAGAGCTTCT  |
| RT3259- <i>ligP</i> | 3259- <i>ligP</i> _F | ACGTCACCTACCGCTCTAT   |
|                     | 3259- <i>ligP</i> _R | CACCCATTTCCCGTCATCGA  |
| RT3365- <i>ligL</i> | 3365- <i>ligL</i> _F | TCCTTGAGAGTCGAGAAATC  |
|                     | 3365- <i>ligL</i> _R | TGGCGGACAACCTGGATGGAA |
| RT <i>ligL-3367</i> | <i>ligL-3367</i> _F  | GCTCCTCGAAGAACTGCCTG  |
|                     | <i>ligL-3367</i> _R  | ATGAGATGGTGCGAGGGGA   |
| RT3367-3368         | 3367-3368_F          | TCCCCTCGCCACCATCTCAT  |
|                     | 3367-3368_R          | CGGTCTGCTCTATTCTTC    |
| RT3589- <i>ligN</i> | 3589- <i>ligN</i> _F | TGACCTGTTCAACCTGCAAG  |
|                     | 3589- <i>ligN</i> _R | AGGACATGGATGTTGCCGAA  |
| RT <i>ligN-3591</i> | <i>ligN-3591</i> _F  | CAGTTCGGCACCCTCATGTA  |
|                     | <i>ligN-3591</i> _R  | GGCTGTCATATACTGCATCC  |
| RT3591-3592         | 3591-3592_F          | GGATGCAGTATATGACAGCC  |
|                     | 3591-3592_R          | CAGGCAGTCATGGCAGGGAA  |

---

For qRT-PCR

|             |                |                         |
|-------------|----------------|-------------------------|
| <i>ligD</i> | <i>qligD_F</i> | CTGGAAGGGCTCGGGATCAC    |
|             | <i>qligD_R</i> | ATAGGCCTCGCGGTCCATGA    |
| <i>ligL</i> | <i>qligL_F</i> | GCGCGGCTGGTGCTT         |
|             | <i>qligL_R</i> | GAAGAACTGCCTGGCTTCGT    |
| <i>ligN</i> | <i>qligN_F</i> | CAGGACGCCCTCGATCAG      |
|             | <i>qligN_R</i> | GGAGTGAACGGCAAGATTGG    |
| <i>ligF</i> | <i>qligF_F</i> | CAAGCGCGCCGAAATG        |
|             | <i>qligF_R</i> | ACGCACCAGCAGAAATATTCATC |
| <i>ligE</i> | <i>qligE_F</i> | TCCGGCTGCACGATCAG       |
|             | <i>qligE_R</i> | CCTTGTGCTTGAGCGCATATT   |
| <i>ligP</i> | <i>qligP_F</i> | GAGCGGTGCGACGATCA       |
|             | <i>qligP_R</i> | TGTGCGCGATGGCATATT      |
| <i>ligG</i> | <i>qligG_F</i> | AGTTCCGCTCCAACCTGATG    |
|             | <i>qligG_R</i> | ATCGTTGAGTGTCTTGCCGA    |
| <i>ligQ</i> | <i>qligQ_F</i> | AGGAACTGACGATCTATCAC    |
|             | <i>qligQ_R</i> | GCATGATTTCCACACGCTCG    |
| <i>ligO</i> | <i>qligO_F</i> | AGCACCCCATCCAGCTCTATT   |
|             | <i>qligO_R</i> | CGAGCATGATGGTACTTTCTG   |
| <i>ldpB</i> | <i>qldpB_F</i> | CATCCGGCAGGACCATCTC     |
|             | <i>qldpB_R</i> | GCGACATTCTTCTGGCTGAAA   |
| <i>ldpA</i> | <i>qldpA_F</i> | CATTCGCTGATGCTGCAGAT    |
|             | <i>qldpA_R</i> | TTGACCAGCACATGGCATT     |

For the construction of probes used in EMSAs

|       |         |                                            |
|-------|---------|--------------------------------------------|
| Dp1   | Dp1_F   | GAGCGGAGATGACGGCGT                         |
|       | Dp1_R   | GAACGCGACCTGATCCTG                         |
| Dp2   | Dp2_F   | TCTCCTGATTTCTACGGC                         |
|       | Dp2_R   | GAACGCGACCTGATCCTG                         |
| Dp3   | Dp3_F   | CCTGTCATGGGCGATCCC                         |
|       | Dp3_R   | GAACGCGACCTGATCCTG                         |
| Dp4   | Dp4_F   | CTTGAAGCGGGTTTCCAC                         |
|       | Dp4_R   | GAACGCGACCTGATCCTG                         |
| Dp5   | Dp5_F   | CGAGAGCCGGAACAGACG                         |
|       | Dp5_R   | GAACGCGACCTGATCCTG                         |
| Dp6   | Dp6_F   | CTTGAAGCGGGTTTCCAC                         |
|       | Dp6_R   | GTCGATCGCGGGGGCGTCCG                       |
| Dp6m1 | pD6m1_F | GTCGATCGCGGGGGCGTCCGGTCTTTGCCAG            |
|       | pD6m1_R | CTTGAAGCGGGTTTCCACTCATTTCCGGACAATGCTGG     |
| Dp6m2 | pD6m2_F | GTCGATCGCGGGGGCGTCCGGTCTTTGTTGACACCAC      |
|       | pD6m2_R | CTTGAAGCGGGTTTCCACTCATTTCCGGGTGG           |
| Dp6m3 | pD6m3_F | GTCGATCGCGGGGGCGTCCGGTCTTTGTTGACATTGTTAAGG |
|       | pD6m3_R | CTTGAAGCGGGTTTCCACTCATCTTAA                |
| Lp1   |         | Gene synthesis (Twist Bioscience)          |
| Lp2   | Lp2_F   | GGGACAACGGACCTTATC                         |
|       | Lp2_R   | GATGAACGCCGTGGTCCC                         |
| Lp3   | Lp3_F   | ATCTGGCAAGGGCGTTTC                         |
|       | Lp3_R   | GATGAACGCCGTGGTCCC                         |
| Lp4   | Lp4_F   | GGGACTGACTGCGGATCA                         |
|       | Lp4_R   | GATGAACGCCGTGGTCCC                         |
| Lp5   | Lp5_F   | GTGCAACGATCATGGGCT                         |
|       | Lp5_R   | GATGAACGCCGTGGTCCC                         |
| Lp6   | Lp6_F   | GGGACTGACTGCGGATCA                         |
|       | Lp6_R   | GGCTTATGCGCCGTTTC                          |

---

|       |         |                                                       |
|-------|---------|-------------------------------------------------------|
| Lp6m1 | Lp6m1_F | GGGACTGACTGCGGATCAGGCATACGCCAGTTTGTG                  |
|       | Lp6m1_R | GGCTTATGCGCCGTTCCGGACAAAAGTGGCGTATG                   |
| Lp6m2 | Lp6m2_F | GGGACTGACTGCGGATCAGGCATACGTTGATTCCACCCGG              |
|       | Lp6m2_R | GGCTTATGCGCCGTTCCGGGTGGAATCAAC                        |
| Lp6m3 | Lp6m3_F | GGGACTGACTGCGGATCAGGCATACGTTGATTTTGTTAAGG             |
|       | Lp6m3_R | GGCTTATGCGCCGCCTTAAA                                  |
| Pp1   | Pp1_F   | CCGCTCGTTTCCAGACATTA                                  |
|       | Pp1_R   | GATGGTGATCTTGTGTCTT                                   |
| Pp2   | Pp2_F   | GCCAAAATCAACTAGCACTG                                  |
|       | Pp2_R   | GATGGTGATCTTGTGTCTT                                   |
| Pp3   | Pp2_F   | GCCAAAATCAACTAGCACTG                                  |
|       | Pp3_R   | CAGTGCTAGTTGATTTTGGC                                  |
| Pp3m1 | Pp3m1_F | CCGCTCGTTTCCAGACATTACTGGCGA                           |
|       | Pp3m1_R | CAGTGCTAGTTGATTTTGGCCATTCGTTCCCGGATCGCCAGTAA          |
| Pp3m2 | Pp3m2_F | CCGCTCGTTTCCAGGTGTTA                                  |
|       | Pp3m2_R | CAGTGCTAGTTGATTTTGGCCATTCGTTCCCGGATCGTTGATAACACCTG    |
| Pp3m3 | Pp3m3_F | CCGCTCGTTCCTTAAACATTA                                 |
|       | Pp3m3_R | CAGTGCTAGTTGATTTTGGCCATTCGTTCCCGGATCGTTGATAATGTTTAAGG |
| Zp1   |         | Gene synthesis (Twist Bioscience)                     |
| Zp2   | Zp2_F   | CCCCATCGTCATCCTGCT                                    |
|       | Zp2_R   | CACATAGTCGACCGTTCT                                    |
| Zp3   | Zp3_F   | AGGACGAGGGGCTGAAGC                                    |
|       | Zp3_R   | CACATAGTCGACCGTTCT                                    |
| Zp4   | Zp4_F   | GCGATCCTCTGGTTGACT                                    |
|       | Zp4_R   | CACATAGTCGACCGTTCT                                    |
| Zp5   | Zp5_F   | CCGATGGAGTCAATGCAG                                    |
|       | Zp5_R   | CACATAGTCGACCGTTCT                                    |
| Zp6   | Zp4_F   | GCGATCCTCTGGTTGACT                                    |
|       | Zp6_R   | CCGCTACAAGGCGGTCTTTT                                  |
| Zp6m1 | Zp6m1_F | GCGATCCTCTGGCCAGCTTTGTTCCG                            |
|       | Zp6m1_R | CCGCTACAAGGCGGTCTTTTTCGAACAAAGCTGGC                   |
| Zp6m2 | Zp6m2_F | GCGATCCTCTGGTTGACTCCACTCG                             |
|       | Zp6m2_R | CCGCTACAAGGCGGTCTTTTTCGAGTGGAG                        |
| Zp6m3 | Zp6m3_F | GCGATCCTCTGGTTGACTTTGTTTAAGG                          |
|       | Zp6m3_R | CCGCTACAAGGCGGTCTTTCCTTAA                             |
| Ap1   | Ap1_F   | GGCATTGTTGACCAGCACAT                                  |
|       | Ap1_R   | AGCGATTCTGGAACCATGTG                                  |
| Ap2   | Ap2_F   | GGGGCGATCCGTGACATC                                    |
|       | Ap2_R   | AGCGATTCTGGAACCATGTG                                  |
| Ap3   | Ap3_F   | CAATGCCGAAGCCGATGC                                    |
|       | Ap3_R   | AGCGATTCTGGAACCATGTG                                  |
| Ap4   | Ap4_F   | ATGGCGTTTCTCTCGAT                                     |
|       | Ap4_R   | AGCGATTCTGGAACCATGTG                                  |
| Ap5   | Ap5_F   | TTGCAGACAAGGAGAGAG                                    |
|       | Ap5_R   | AGCGATTCTGGAACCATGTG                                  |

---

**TABLE S3.** dTetR and dMarR nucleotide sequences and amino acid sequences.

| Name                | Sequence (5' to 3') or (N- to C-terminal)                                                                                                                                                                                                                                                                                                                                                                                                                                                                                                                                                                                                                                                                                                                                                                                                                                                                                                                                      |
|---------------------|--------------------------------------------------------------------------------------------------------------------------------------------------------------------------------------------------------------------------------------------------------------------------------------------------------------------------------------------------------------------------------------------------------------------------------------------------------------------------------------------------------------------------------------------------------------------------------------------------------------------------------------------------------------------------------------------------------------------------------------------------------------------------------------------------------------------------------------------------------------------------------------------------------------------------------------------------------------------------------|
| dTetR<br>nucleotide | ATGACGGGCGGAAAGGCCGTGCTGGACCGCTTTGCGGTGGGGGTCGACAAGGACGCGATCATCGCGGCTGCGCTGGCGCTGC<br>AGGCGAAACATGGGTGGCGGGCTGCACGCTCGCTGCAGTCGCGGAACGGCTGCGCGTCGACGAGACGCAGGTGAGCCGACA<br>TTTCGCTGATCGCGCGGACCTGCTGACGGCCATGGCGCGGAGATTGCCCGCGCGTCCGCGCCACGCCGCCCGCGCAGGGCT<br>GGCGGGCGCAGCTCGTCCAGCGCGCCAGTGCCGGGCGCCAGCTGATGCTTCCCGGGCGGACGGCGCATTGCTGTTGCGCGAC<br>ATGCCGTCTCTTCCCGCTGGAGGAACAGGCTTCGACTGTGTGCCGGCCCTTTCGAGGTGGGTTTTCTCCGGCCGATGCG<br>CGCGCCCGCTGGCGCTCGTCGATCGGTTACGGTTCGGTTCGCGGTGGCCGAGCAGCCGCGCCGGCCAGTGGGAGACGTC<br>GGCAAGCTTCGAGAGCCAGCTTGACATTGCTCTGTCGGACTTGCTCCGCCCGCCCGACGGCTGGTGGCGCAGCGGGACG<br>ACCGGCTGCGTCGCTCCAGTCAAGCCTCTGGGTGTTCTGCGCGATGCGTGA                                                                                                                                                                                                                                                                                                             |
| dTetR<br>amino acid | MTGGKAVLDRFAVGVDKDAIIAALALQAKHGLAGCTLAAVAERLRVDETVSRHFADRADLLTAMAREIARGVRATPPAQGWRA<br>QLVQRASAGRQLMLSRRDGALLFAHMPSLFPPGGTGFDVCPALCEVGFSPADARAVALVDRFTVGFVAVEQAAPASAETSASFESQ<br>LDIVLSGLASARPDGLVAQRDDRLRRFQSSLWVFLRDA                                                                                                                                                                                                                                                                                                                                                                                                                                                                                                                                                                                                                                                                                                                                                        |
| dMarR<br>nucleotide | ATGGCGCGGAAAGCGCAACATCTCTTTGCGCGGACTGTCCACATCAACGAACTGGATCGCCGCATCCTACTGCTGCTTCAG<br>GCGCAGGGCGACATGACGCTTGCCGCGATTTCCTGTCCACGGGGTGGACAAGGCGCAGGTGAGCCGCGCGATCAAGCGCAT<br>GACGGAGATCTCGCTGCTCGCCCGCGGGCATCCGACCCGATCCGCTGAGTGCAGCGGGCCAGCTTGCCGAGCGCT<br>TGCTGCGGCAGGCTGAGCTGCGCAATCGTGAGCTGACGTTCCGCATCACGGACGAGCAGATCGTCACGCTGTTGCGGTGCTG<br>GACACGCTGCTGACCCGCGCCGTCGCGCTGTTGAGAAGGAGCGCAAGCTCGTCGCGTCCAACCAGCGGCAGGAACCGGTGCG<br>ATTTCCAGGATCTGGTCGCGGAGGGCCTGCCGACGAGAACGGGATTGCCGTGGATCGCTCGCGCATCCTTCCGCCGTTTCATTA<br>CGCTGTGTTTCGTACATGCTGCGGGGCGGGGCGCTCGCTCACAAAGCGGCGACCCGGGCTTCCAACCTCGAGAGCTGGGTCATT<br>GCCGAGATCTGCCGAATCCGCAATCAGCTGGCCGAGCTGGTGTGGCCCTTATCGCGACCAGAGCCAGGCAGGGCGAAC<br>GGTCAATCATCTGGTGGAGAGCGCCTTGTGAGCGCACCGGCAAGCCGGGGCGGCGCCATGGCTTCTTCGCGCCGACCGAGG<br>AGGGCCGGCGGATCAGCGACATCATTGCGACACCGCCGCGGCGCAGCGAATTCCTTCCAGGGCATCCCGCCCCCGCAG<br>CTCGACAGTTCATGGACGCGTTCGACATCTTTGCGCAATGCCGAAGTGCAGCTCGCCGGGAAAAGCGGATCCAGGAGAT<br>GGACCGGGACTGA |
| dMarR<br>amino acid | MARESANISFARTVHINELDRRILLLLQAQDMTLAAISLSTGVDKAQVSRAIKRMTEISLLARGGIRSPIRLSASGRQLAERLLRQAE<br>LRNRELTFGITDEQIVTLFGVLDLTLTRAVALFEKERKLVASNQRQEPVDFQDLVAEGLPDENGIADVDRSRLPPFITLCSYMLRGGALA<br>HKRRTGLSNFESWVIAEICRNPPISWPQLVLALYRDQSQAGRTVNHLVESGLVERTGKPGRRRHGFAPTEEGRRISDIIRDTAARRSEFL<br>FQGIPPPQLDSFMDAFDILSRNAEVQLAREKAIQEMDRD                                                                                                                                                                                                                                                                                                                                                                                                                                                                                                                                                                                                                                                |



**TABLE S4.** Synthesized genes used for EMSA in this study.

| Name | Sequence (5' to 3')                                                                                                                                                                                                                                                                                                |
|------|--------------------------------------------------------------------------------------------------------------------------------------------------------------------------------------------------------------------------------------------------------------------------------------------------------------------|
| Zp1  | CGGCGACCTGCGCACCGCGATCCTCAGCGTGAAGTGGGTCGCGATCCCCATCGTCATCCTGCTGCTGGTGTGGTGTTCGGATCCG<br>CAAGGACGAGGGGCTGAAGCTCGAGCGGGCGGGGCGGGCGGCGAACCCGTCTGACCCGCCCCGGCCGGCCTGCGCGATCCTCT<br>GGTTGACTTTGTTGAAAAAGACCGCCTTGTAGCGGCCGATGGAGTCAATGCAGCGCACAGCCAAATCGTGCGCGGGGTGAGA<br>GGAAAGACAGGCCAATGGTTGATGTCAGAACGGTCGACTATGTG |
| Lp1  | TTGTCCGCCAGGGCTGGGCCGTGAGCGGCGATGGCCGGGACAACGGACCTTATCGGACCGAGCAAGCGACCGCGGGCGGGCTGG<br>CCGGGGCATCTGGCAAGGGCGTTTCGATCGCCGGGTGACTGGCGCGGGCAAACCGGCACCCGCGGGACTGACTGCGGATCAGG<br>CATACGTTGATTTGTCCGGAACGCGCATAAGCCGTGCAACGATCATGGGCTTACCGCCCGGCAGCAAGCGATCGGTTGGAACA<br>GGAGAGGAAGCATCATGGACATCGCAGGGACCACGGCGTTCATC |

**TABLE S5.** RNA-Seq analysis of SYK-6 grown in the presence and absence of GGE

| Gene                  | SYK-6 SEMP (TPM) | SEMP + GGE (TPM) | Fold (GGE + SEMP/SEMP) |
|-----------------------|------------------|------------------|------------------------|
| GGE catabolism genes  |                  |                  |                        |
| <i>ligD</i> *         | 19               | 740              | 39                     |
| <i>ligL</i> *         | 21               | 59               | 2.8                    |
| <i>ligN</i> *         | 25               | 156              | 6.2                    |
| <i>ligF</i>           | 27               | 681              | 25                     |
| <i>ligE</i>           | 11               | 436              | 40                     |
| <i>ligP</i>           | 27               | 1099             | 41                     |
| <i>ligG</i>           | 10               | 198              | 20                     |
| <i>ligQ</i>           | 1145             | 1717             | 1.5                    |
| <i>hvpZ</i>           | 30               | 394              | 13                     |
| SLG_20400             | 439              | 220              | 0.5                    |
| <i>vceA</i>           | 158              | 256              | 1.6                    |
| <i>vceB</i>           | 144              | 177              | 1.2                    |
| DGPD catabolism genes |                  |                  |                        |
| <i>ligO</i>           | 14               | 60               | 4.3                    |
| <i>ldpB</i>           | 6                | 61               | 10                     |
| <i>ldpC</i>           | 18               | 68               | 3.8                    |
| <i>ldpA</i>           | 9                | 149              | 17                     |

\* Genes involved in both GGE and DGPD catabolism.

TABLE S6. Orthologs of LigS and catabolic enzymes of GGE and DGPD in bacteria

| Strains (ANI%)                                   | LigS   |                       | LigD   |                       | LigT   |                       | LigN   |                       | LigF      |                       | LigE   |                       | LigP   |                       | LigG   |                       | LigO   |                       | HpxZ   |                       | LigO   |                       | LtpC   |                       | LtpB   |                       | LtpA   |                       |       |       |
|--------------------------------------------------|--------|-----------------------|--------|-----------------------|--------|-----------------------|--------|-----------------------|-----------|-----------------------|--------|-----------------------|--------|-----------------------|--------|-----------------------|--------|-----------------------|--------|-----------------------|--------|-----------------------|--------|-----------------------|--------|-----------------------|--------|-----------------------|-------|-------|
|                                                  | Evalue | Per. ident. Accession | Evalue    | Per. ident. Accession | Evalue | Per. ident. Accession | Evalue | Per. ident. Accession | Evalue | Per. ident. Accession | Evalue | Per. ident. Accession | Evalue | Per. ident. Accession | Evalue | Per. ident. Accession | Evalue | Per. ident. Accession | Evalue | Per. ident. Accession | Evalue | Per. ident. Accession |       |       |
| <i>Sphingobium iguivorum</i> B1D3A (86.37)       | 0      | 99.61                 | 0      | 99.02                 | 0      | 98.98                 | 0      | 99.36                 | 0         | 99.29                 | 0      | 99.29                 | 0      | 99.29                 | 0      | 97.74                 | 0      | 98.66                 | 0      | 99.44                 | 0      | 99.68                 | 3e-177 | 97.59                 | 0      | 98.83                 | 0      | 98.35                 | 0     | 98.35 |
| <i>Sphingobium xanthum</i> NLS (78.56)           | 0      | 73.45                 | 0      | 87.54                 | 8e-165 | 78.55                 | 0      | 91.67                 | 1e-178    | 91.67                 | 0      | 92.17                 | 0      | 95.02                 | 8e-177 | 89.66                 | 2e-172 | 80.49                 | 0      | 88.41                 | 0      | 89.23                 | 87.15  | 0                     | 88.23  | 4e-168                | 90     | 0                     | 88.35 |       |
| <i>Sphingobium nicotianae</i> H33 (78.35)        | 0      | 70.92                 | 0      | 85.57                 | 0      | 82.35                 | 4e-170 | 77.49                 | 9e-180    | 90.23                 | 0      | 89.96                 | 0      | 83.93                 | 7e-177 | 88.46                 | 1e-170 | 79.58                 | 0      | 90.25                 | 0      | 87.21                 | 4e-159 | 87.95                 | 0      | 87.46                 | 1e-167 | 90.34                 | 0     | 88.35 |
| <i>Sphingobium</i> sp. B1D2B (78.07)             | 0      | 64.53                 | 0      | 82.78                 | 0      | 84.38                 | 0      | 89.39                 | 1e-175    | 88.33                 | 1e-127 | 83.84                 | 0      | 88.87                 | 4e-175 | 87.69                 | 0      | 86.74                 | 0      | 90.58                 | 5e-76  | 41.13                 | 87.47  | 0                     | 84.82  | 3e-160                | 86.25  | 0                     | 88.35 |       |
| <i>Sphingobium</i> sp. B1D2B (78.08)             | 0      | 64.53                 | 0      | 82.78                 | 0      | 84.38                 | 0      | 89.39                 | 1e-175    | 88.33                 | 1e-127 | 83.84                 | 0      | 88.87                 | 1e-175 | 88.08                 | 0      | 86.74                 | 0      | 90.4                  | 5e-76  | 41.13                 | 84.34  | 0                     | 84.82  | 8e-119                | 88.19  | 0                     | 88.35 |       |
| <i>Sphingobium</i> sp. B1D3B (78.28)             | 0      | 64.34                 | 0      | 82.78                 | 0      | 84.03                 | 0      | 88.75                 | 3e-174    | 87.92                 | 1e-127 | 83.84                 | 0      | 88.61                 | 7e-175 | 87.31                 | 0      | 86.74                 | 0      | 90.4                  | 2e-75  | 40.78                 | 84.74  | 0                     | 84.82  | 7e-162                | 87.08  | 0                     | 88.35 |       |
| <i>Sphingobium</i> sp. B8D3D (78.2)              | 0      | 64.34                 | 0      | 82.12                 | 0      | 83.68                 | 0      | 89.07                 | 5e-176    | 88.72                 | 5e-127 | 83.47                 | 0      | 88.61                 | 7e-175 | 87.31                 | 0      | 86.74                 | 0      | 90.22                 | 3e-76  | 41.13                 | 84.34  | 0                     | 84.82  | 8e-119                | 86.67  | 0                     | 88.35 |       |
| <i>Sphingobium</i> sp. B8D3A (78.01)             | 0      | 64.34                 | 0      | 82.12                 | 0      | 83.68                 | 0      | 89.07                 | 5e-176    | 88.72                 | 5e-127 | 83.47                 | 0      | 88.61                 | 7e-175 | 87.31                 | 0      | 86.74                 | 0      | 90.22                 | 3e-76  | 41.13                 | 84.34  | 0                     | 84.82  | 8e-119                | 86.67  | 0                     | 88.35 |       |
| <i>Sphingobium</i> sp. B8D3C (78.11)             | 0      | 64.15                 | 0      | 83.11                 | 0      | 84.03                 | 0      | 89.07                 | 6e-176    | 88.72                 | 5e-127 | 83.47                 | 0      | 88.61                 | 7e-175 | 87.69                 | 0      | 86.74                 | 0      | 90.58                 | 7e-76  | 40.78                 | 84.74  | 0                     | 84.82  | 2e-160                | 86.25  | 0                     | 88.35 |       |
| <i>Sphingobium</i> sp. B8D3B (78.23)             | 0      | 64.15                 | 0      | 83.11                 | 0      | 84.03                 | 0      | 89.07                 | 6e-176    | 88.72                 | 5e-127 | 83.47                 | 0      | 88.61                 | 7e-175 | 87.69                 | 0      | 86.74                 | 0      | 90.58                 | 7e-76  | 40.78                 | 84.74  | 0                     | 84.82  | 2e-160                | 86.25  | 0                     | 88.35 |       |
| <i>Sphingobium</i> sp. B2D3D (77.92)             | 0      | 64.15                 | 0      | 83.11                 | 0      | 84.03                 | 0      | 89.07                 | 6e-176    | 88.72                 | 5e-127 | 83.47                 | 0      | 88.61                 | 7e-175 | 87.69                 | 0      | 86.74                 | 0      | 90.58                 | 7e-76  | 40.78                 | 84.74  | 0                     | 84.82  | 2e-160                | 86.25  | 0                     | 88.35 |       |
| <i>Sphingobium</i> sp. B2D3A (77.86)             | 0      | 64.15                 | 0      | 82.45                 | 0      | 84.38                 | 0      | 88.42                 | 1e-175    | 88.33                 | 1e-127 | 83.84                 | 0      | 88.87                 | 1e-173 | 86.54                 | 0      | 86.74                 | 0      | 90.58                 | 2e-75  | 40.78                 | 84.74  | 0                     | 84.82  | 4e-161                | 86.67  | 0                     | 88.35 |       |
| <i>Sphingobium</i> sp. B1D7B (77.94)             | 0      | 64.15                 | 0      | 82.45                 | 0      | 84.38                 | 0      | 88.42                 | 1e-175    | 88.33                 | 1e-127 | 83.84                 | 0      | 88.87                 | 1e-173 | 86.54                 | 0      | 86.74                 | 0      | 90.58                 | 2e-75  | 40.78                 | 84.74  | 0                     | 84.82  | 4e-161                | 86.67  | 0                     | 88.35 |       |
| <i>Sphingobium</i> sp. B11D3D (78.03)            | 0      | 64.15                 | 0      | 83.11                 | 0      | 83.68                 | 0      | 88.42                 | 2e-174    | 87.94                 | 1e-127 | 83.84                 | 0      | 88.87                 | 1e-175 | 88.08                 | 0      | 86.74                 | 0      | 90.58                 | 7e-76  | 40.78                 | 84.74  | 0                     | 84.82  | 4e-161                | 86.67  | 0                     | 88.35 |       |
| <i>Sphingobium</i> sp. B11D3A (78.23)            | 0      | 64.15                 | 0      | 83.11                 | 0      | 84.03                 | 0      | 89.07                 | 2.00E-176 | 87.94                 | 1e-127 | 83.84                 | 0      | 88.87                 | 1e-175 | 87.64                 | 0      | 86.74                 | 0      | 90.58                 | 7e-76  | 40.78                 | 84.74  | 0                     | 84.82  | 7e-162                | 87.08  | 0                     | 88.35 |       |
| <i>Sphingobium</i> sp. B10D7B (78.16)            | 0      | 64.15                 | 0      | 83.11                 | 0      | 84.03                 | 0      | 89.07                 | 2.00E-176 | 87.94                 | 1e-127 | 83.84                 | 0      | 88.87                 | 1e-175 | 87.64                 | 0      | 86.74                 | 0      | 90.58                 | 7e-76  | 40.78                 | 84.74  | 0                     | 84.82  | 7e-162                | 87.08  | 0                     | 88.35 |       |
| <i>Sphingobium</i> sp. B10D7A (78.14)            | 0      | 64.15                 | 0      | 82.78                 | 0      | 84.72                 | 0      | 89.07                 | 5e-176    | 88.72                 | 5e-127 | 83.47                 | 0      | 88.61                 | 3e-174 | 86.54                 | 0      | 84.69                 | 0      | 90.4                  | 5e-76  | 41.13                 | 83.94  | 0                     | 84.82  | 8e-119                | 88.19  | 0                     | 88.35 |       |
| <i>Sphingobium xanthum</i> B10D3A(78.06)         | 0      | 64.15                 | 0      | 82.78                 | 0      | 84.72                 | 0      | 89.07                 | 5e-176    | 88.72                 | 5e-127 | 83.47                 | 0      | 88.61                 | 3e-174 | 86.54                 | 0      | 84.69                 | 0      | 90.4                  | 5e-76  | 41.13                 | 83.94  | 0                     | 84.82  | 8e-119                | 88.19  | 0                     | 88.35 |       |
| <i>Sphingobium</i> sp. B2D3C (77.98)             | 0      | 63.76                 | 0      | 83.11                 | 0      | 84.38                 | 0      | 89.39                 | 1e-175    | 88.33                 | 1e-127 | 83.84                 | 0      | 88.87                 | 8e-178 | 88.46                 | 0      | 86.38                 | 0      | 90.58                 | 7e-76  | 40.78                 | 84.74  | 0                     | 84.82  | 7e-162                | 87.08  | 0                     | 88.35 |       |
| <i>Sphingobium</i> sp. B2D3B (78.06)             | 0      | 63.76                 | 0      | 83.11                 | 0      | 84.38                 | 0      | 89.39                 | 1e-175    | 88.33                 | 1e-127 | 83.84                 | 0      | 88.87                 | 8e-178 | 88.46                 | 0      | 86.38                 | 0      | 90.58                 | 7e-76  | 40.78                 | 84.74  | 0                     | 84.82  | 7e-162                | 87.08  | 0                     | 88.35 |       |
| <i>Erythrobacter</i> sp. SG81-L                  | 3e-56  | 51.5                  | 6e-55  | 40.28                 | 8e-97  | 50.75                 | 1e-149 | 68.59                 | 3e-110    | 63.11                 | 2e-132 | 66.42                 | 5e-189 | 80.9                  | 3e-112 | 60.58                 | 0      | 86.38                 | 0      | 73.13                 | 1e-71  | 43.77                 | 81.54  | 3e-145                | 67.68  | 3e-119                | 71.68  | 0                     | 88.35 |       |
| <i>Attermyrobacter laurussii</i> Y-8             | 2e-92  | 50.62                 |        |                       |        |                       |        |                       | 7e-107    | 59.02                 | 1e-105 | 55.8                  | 7e-121 | 60.65                 | 4e-110 | 58.97                 |        |                       |        | 3e-120                | 69.64  | 7e-144                | 68.54  | 4e-118                | 72.65  | 4e-118                | 72.65  | 0                     | 88.35 |       |
| <i>Attermyrobacter</i> sp. CC-Y8T894             | 4e-104 | 47.84                 |        |                       | 5e-94  | 50                    | 4e-71  | 43.28                 | 5e-57     | 41.54                 | 7e-114 | 59.71                 | 2e-132 | 66.06                 | 8e-115 | 61.31                 | 0      | 72.95                 | 1e-68  | 41.79                 | 90.68  | 4e-120                | 72.06  | 1e-144                | 67.32  | 3e-119                | 70.35  | 0                     | 88.35 |       |
| <i>Aurantobacterium spongiae</i> HN-Y73          | 5e-89  | 47.81                 | 3e-112 | 55.56                 | 2e-94  | 50.37                 | 6e-154 | 69.77                 | 5e-109    | 61.49                 | 6e-131 | 68.3                  | 2e-161 | 75.89                 | 3e-118 | 61.68                 | 0      | 71.06                 | 3e-172 | 79.73                 | 3e-100 | 60.32                 | 4e-142 | 65.23                 | 2e-119 | 70.35                 | 0      | 88.35                 |       |       |
| <i>Aurantobacterium xanthus</i> CCTCC AB 2015396 | 6e-93  | 47.63                 |        |                       | 2e-110 | 61.89                 | 2e-111 | 66.79                 | 6e-121    | 69.35                 | 2e-111 | 66.79                 | 6e-121 | 69.35                 | 2e-111 | 66.79                 | 0      | 71.43                 | 6e-112 | 60.44                 | 9e-128 | 68.44                 | 3e-138 | 66.01                 | 3e-119 | 71.24                 | 0      | 88.35                 |       |       |
| <i>Attermyrobacter lulius</i> KACC 19119         | 3e-101 | 47.24                 |        |                       | 9e-94  | 50                    | 4e-143 | 68.91                 | 5e-110    | 63.52                 | 2e-134 | 67.9                  | 5e-167 | 79.71                 | 2e-113 | 60.95                 | 0      | 73.51                 | 1E-66  | 42.09                 | 9e-117 | 70.33                 | 7e-145 | 67.89                 | 5e-118 | 72.12                 | 0      | 88.35                 |       |       |
| <i>Attermyrobacter</i> sp. Root672               | 6e-92  | 47.18                 |        |                       | 3e-95  | 49.1                  | 2e-116 | 63.82                 | 9e-124    | 64.07                 | 9e-161 | 76.16                 | 9e-161 | 76.16                 | 1e-119 | 62.41                 | 0      | 71.79                 | 8e-65  | 40.27                 | 6e-122 | 68.83                 | 2e-145 | 68.21                 | 6e-119 | 70.85                 | 0      | 88.35                 |       |       |
| <i>Croceobacterium aestuarii</i> D39             | 1e-98  | 46.58                 |        |                       | 1e-96  | 50.18                 | 2e-56  | 41.2                  | 7e-112    | 61.38                 | 9e-105 | 56.04                 | 2e-128 | 62.99                 | 7e-121 | 62.62                 | 0      | 70.11                 | 3e-66  | 42.42                 | 3e-112 | 68.67                 | 7e-143 | 65.56                 | 1e-117 | 71.3                  | 0      | 88.35                 |       |       |
| <i>Attermyrobacter palmatis</i> KCTC52807        | 2e-83  | 46.44                 |        |                       | 3e-108 | 59.84                 | 2e-106 | 57.41                 | 7e-120    | 60.29                 | 3e-111 | 59.12                 | 3e-111 | 59.12                 | 3e-111 | 59.12                 | 0      | 71.43                 | 8e-119 | 69.23                 | 3e-144 | 67.88                 | 3e-117 | 70.35                 | 0      | 88.35                 |        |                       |       |       |
| <i>Aurantobacterium sauedae</i> GH3-15           | 1e-92  | 46.3                  |        |                       | 8e-109 | 60.66                 | 2e-108 | 56.79                 | 7e-118    | 58.76                 | 1e-118 | 58.76                 | 1e-118 | 58.76                 | 1e-118 | 58.76                 | 0      | 71.43                 | 2e-119 | 69.26                 | 1e-134 | 64.69                 | 4e-117 | 69.91                 | 0      | 88.35                 |        |                       |       |       |
| <i>Croceobacterium selenioidans</i> LX-88        | 1e-98  | 46.3                  |        |                       | 8e-91  | 46.93                 | 2e-116 | 63.82                 | 2e-126    | 65.56                 | 1e-161 | 76.16                 | 1e-161 | 76.16                 | 1e-118 | 61.31                 | 0      | 71.43                 | 2e-124 | 70.45                 | 1e-141 | 66.89                 | 9e-121 | 72.65                 | 0      | 88.35                 |        |                       |       |       |
| <i>Attermyrobacter saegetsi</i> YJ20             | 8e-98  | 46.17                 | 3e-113 | 55.89                 | 2e-94  | 49.46                 | 3e-57  | 40.65                 | 3e-104    | 59.43                 | 4e-110 | 58.24                 | 1e-127 | 63.21                 | 4e-112 | 60.95                 | 0      | 71.22                 | 4e-85  | 48.13                 | 1e-111 | 68.83                 | 1e-149 | 69.54                 | 2e-115 | 69.96                 | 0      | 88.35                 |       |       |
| <i>Aurantobacter</i> sp. DGJ5                    | 6e-91  | 46.01                 |        |                       | 6e-107 | 59.43                 | 7e-111 | 57.3                  | 3e-120    | 61.11                 | 2e-105 | 56.78                 | 9e-129 | 63.17                 | 3e-118 | 61.9                  | 0      | 71.43                 | 4e-118 | 67.62                 | 2e-135 | 65.35                 | 3e-118 | 70.8                  | 0      | 88.35                 |        |                       |       |       |
| <i>Croceobacterium salegens</i> MCCC 1K01500     | 2e-101 | 45.79                 |        |                       | 3e-97  | 50.18                 | 2e-58  | 41.2                  | 1e-104    | 58.61                 | 2e-105 | 56.78                 | 9e-129 | 63.17                 | 1e-116 | 62.27                 | 0      | 70.79                 | 5e-65  | 41.41                 | 1e-117 | 68.27                 | 1e-138 | 64.03                 | 4e-114 | 70.4                  | 0      | 88.35                 |       |       |
| <i>Aurantobacterium indicum</i> DSM 18604        | 9e-96  | 45.45                 | 3e-111 | 55.1                  | 6e-94  | 48.2                  | 1e-150 | 68.71                 | 2e-108    | 63.63                 | 4e-133 | 67.53                 | 2e-161 | 76.6                  | 3e-116 | 60.95                 | 0      | 71.59                 | 1e-168 | 78.45                 | 7e-92  | 60.73                 | 3e-137 | 66.79                 | 4e-118 | 70.35                 | 0      | 88.35                 |       |       |
| <i>Aurantobacter</i> sp. MJD11                   | 2e-95  | 45.41                 |        |                       | 3e-110 | 61.76                 | 1e-113 | 57.35                 | 8e-125    | 61.9                  | 1e-113 | 57.35                 | 8e-125 | 61.9                  | 3e-112 | 59.49                 | 0      | 71.43                 | 9e-141 | 65.79                 | 2e-125 | 71.72                 | 9e-141 | 65.79                 | 1e-131 | 75                    | 0      | 88.35                 |       |       |
| <i>Aurantobacterium endophyticum</i> LMG 29518   | 2e-92  | 44.5                  | 3e-104 | 51.7                  | 3e-96  | 49.82                 | 1e-154 | 69.23                 | 4e-105    | 61.76                 | 5e-135 | 67.53                 | 1e-162 | 78.49                 | 4e-121 | 64.86                 | 0      |                       |        |                       |        |                       |        |                       |        |                       |        |                       |       |       |

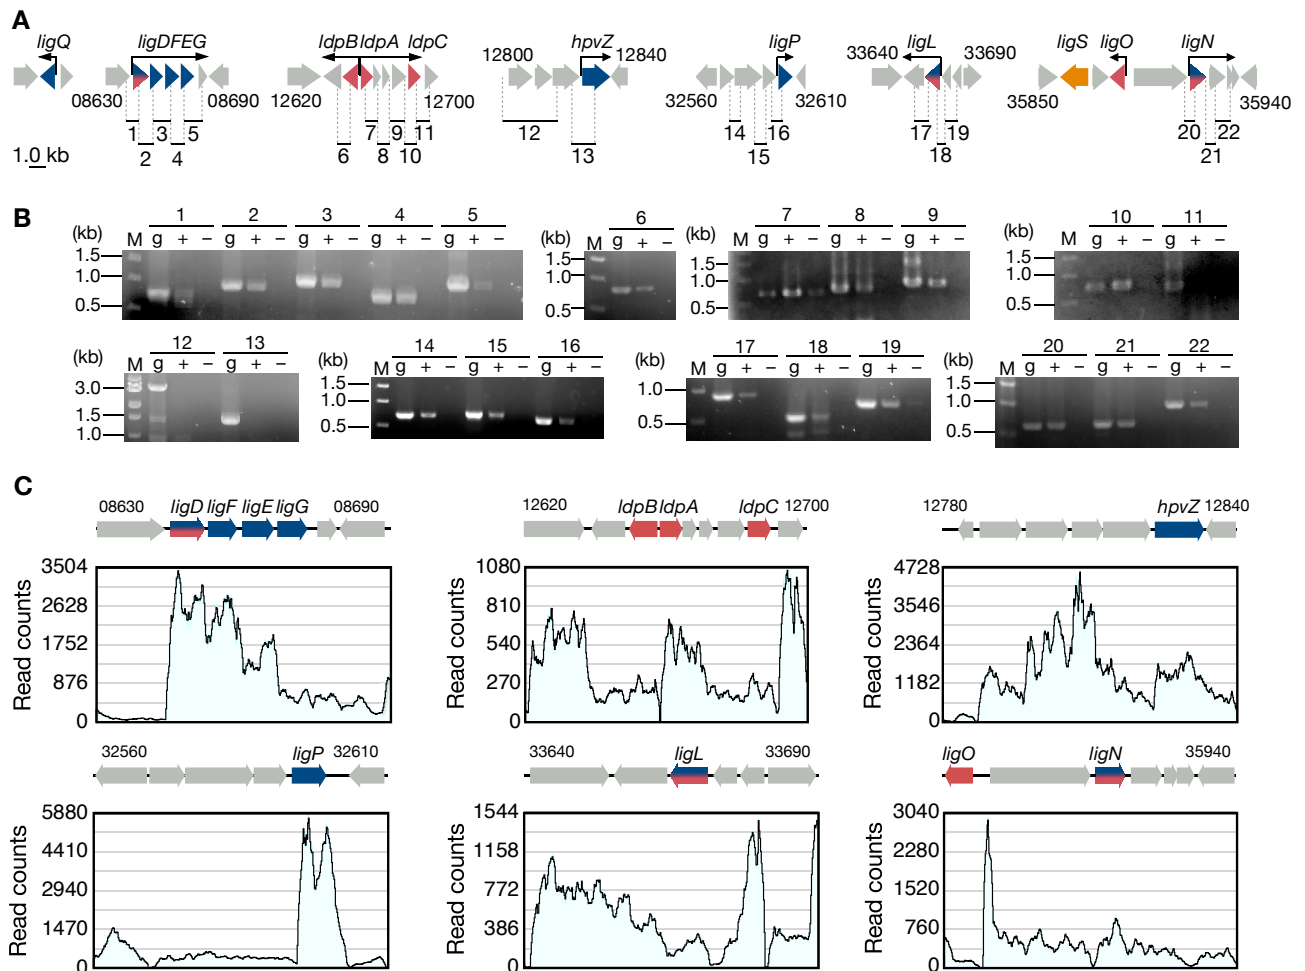

**Fig. S1. Identification of transcription units for GGE and DGPD catabolism genes.**

(A) Organization of the GGE and DGPD catabolism genes. The bars with numbers below the map indicate the regions to be amplified and correspond to the numbering in panel B. (B) Agarose gel electrophoresis of RT-PCR assays with primers amplifying the regions shown in panel A. Total RNAs isolated from SYK-6 cells grown in Wx-SEMP + 5 mM GGE were used as templates for cDNA synthesis. Lanes: M, molecular size markers; g, control PCR with the SYK-6 genomic DNA; + and -, RT-PCR with or without reverse transcriptase, respectively. (C) RNA-Seq read coverage of the GGE and DGPD catabolism genes. RNAseq was performed using RNA obtained from SYK-6 cells grown in Wx-SEMP + 5 mM GGE.

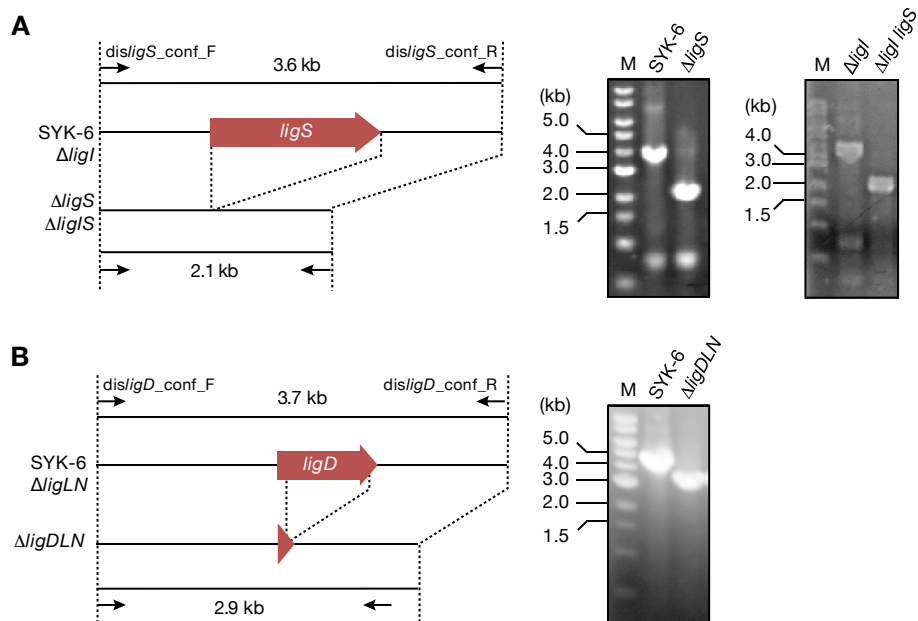

**Fig. S2. Construction of *ligS* mutants and *ligD ligL ligN* triple mutant.**

The left panels show schematic representations of the disruption of *ligS* in SYK-6 and  $\Delta ligI$  (A) and the disruption of *ligD* in  $\Delta ligLN$  (B). The disruption of the genes was examined by colony PCR analyses (right side panels). The primer pairs used for colony PCR analyses are shown in Table S2. M, molecular size markers.

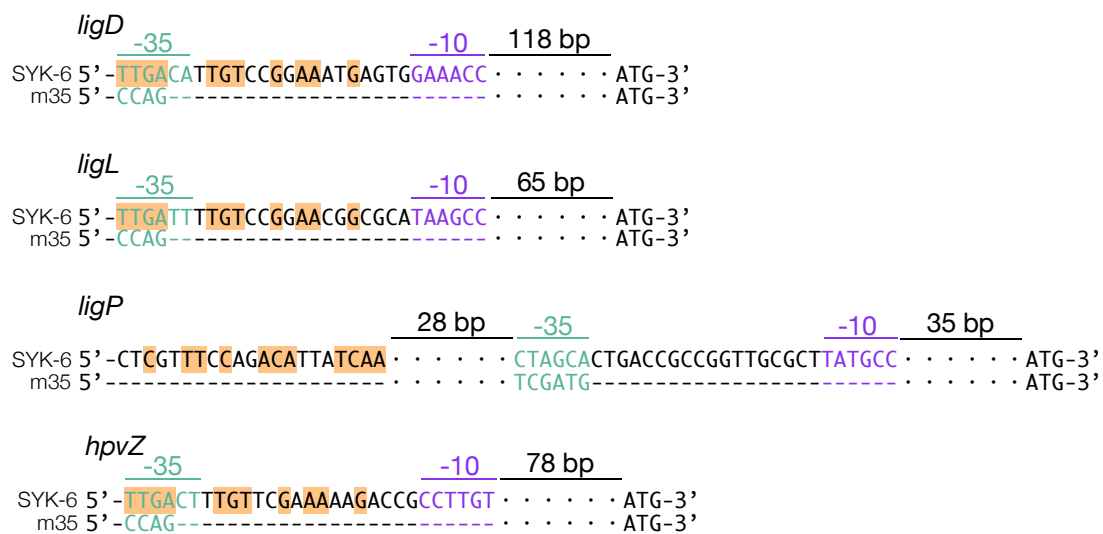

**Fig. S3. Mutation into the putative *ligD*, *ligL*, *ligP*, and *hpvZ* promoter sequences.**

The putative -35 and -10 elements are shown in green and violet, respectively. LigS binding sequences were highlighted in yellow. Mutations in the -35 element are shown as m35.

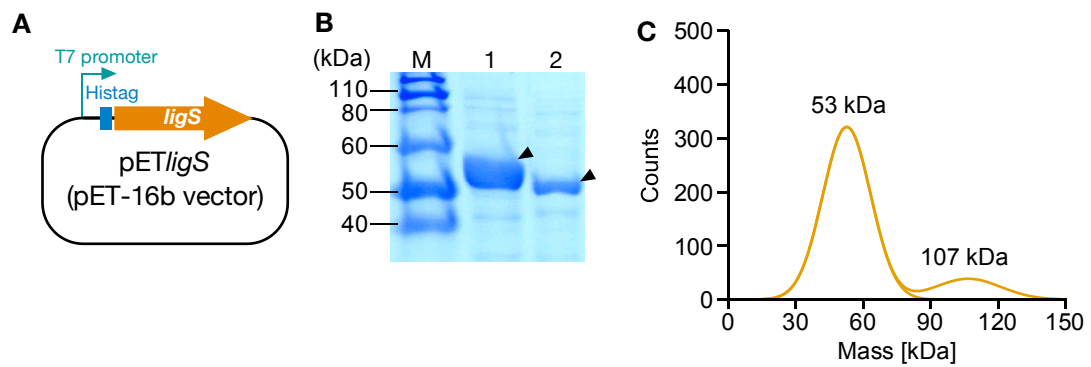

**Fig. S4. Purification and molecular mass analysis of LigS.**

(A) A plasmid construction of pET*ligS*. (B) SDS-PAGE of purified LigS. Lanes: M, molecular size markers; 1, His-LigS (2  $\mu$ g); 2, LigS with His-tag removed by Factor Xa (2  $\mu$ g). (C) Molecular mass analysis of LigS using Mass photometry.

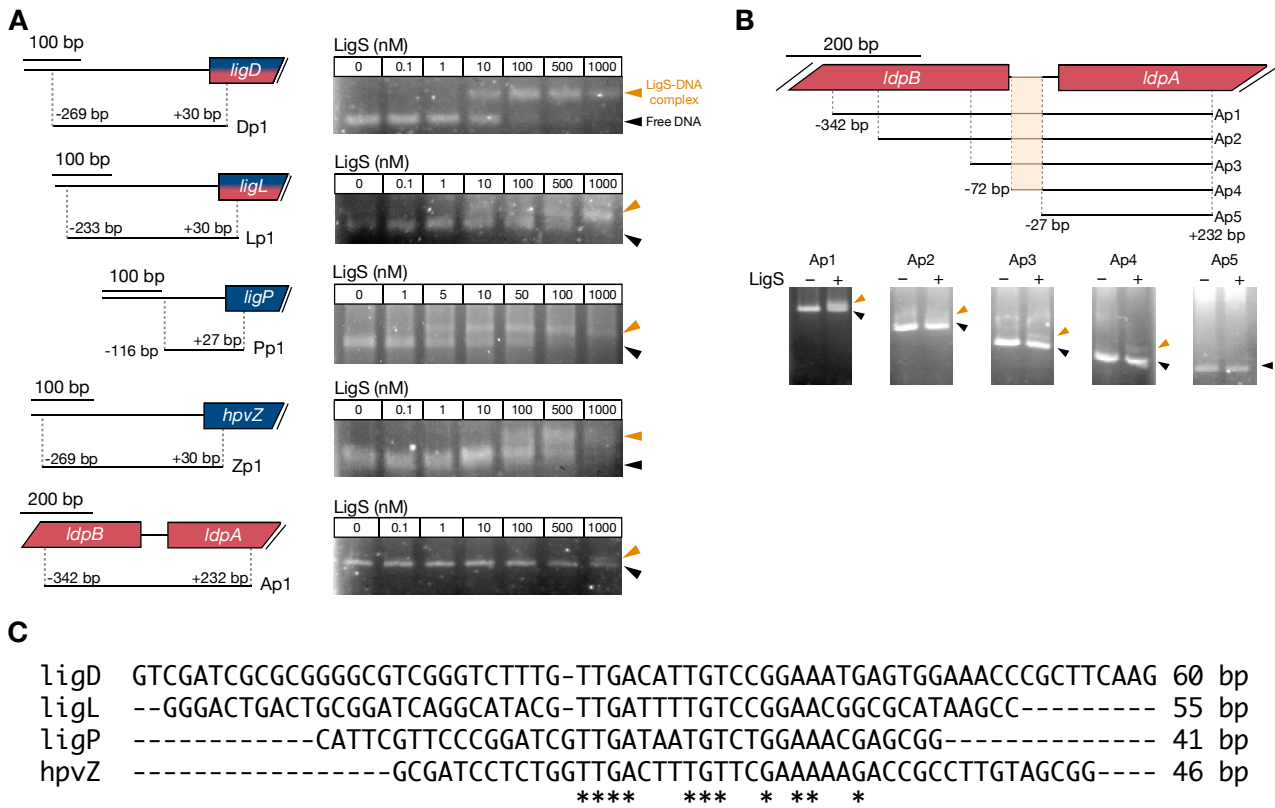

**Fig. S5. Identification of LigS binding region.**

(A) EMSAs of LigS (0–1000 nM) binding to Dp1, Lp1, Pp1, Zp1, and Ap1 probes (40 fmol). (B) EMSA of LigS (1000 nM) binding to stepwise shortened *ldpA* probes (40 fmol). Each probe was incubated in the presence (+) and absence (-) of purified LigS. (C) Alignment of LigS binding regions upstream of *ligD*, *ligL*, *ligP*, and *hpvZ*. Alignment was performed using Clustal W.



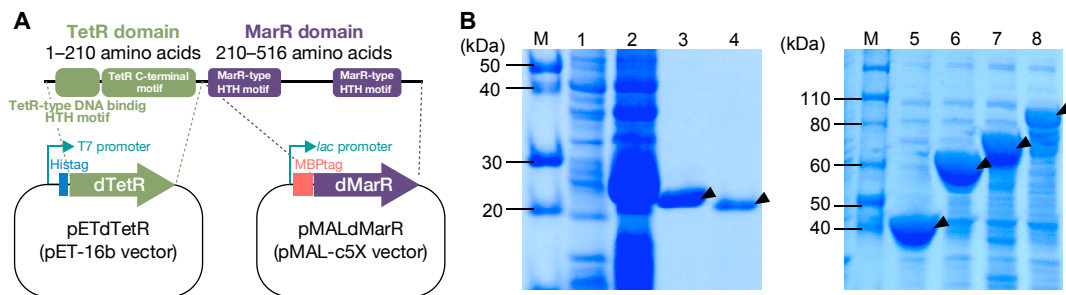

**Fig. S6. Expression plasmids for coding regions of TetR and MarR domains.**

(A) Plasmids construction of pETdTetR and pMALdMarR. dTetR uses amino acid residues from position 1 to 210 of LigS, and dMarR uses amino acid residues from position 210 to 516. dTetR and dMarR have a stop codon (TGA) and a start codon (ATG) added, respectively. (B) SDS-PAGE of dTetR and dMarR. Lanes: M, molecular size markers; 1, cell extracts of *E. coli* harboring pET-16b (10  $\mu$ g); 2, cell extracts of *E. coli* harboring pETdTetR (10  $\mu$ g); 3, purified His-dTetR (2  $\mu$ g); 4, purified dTetR with His-tag removed by Factor Xa (2  $\mu$ g); 5, cell extracts of *E. coli* harboring pMAL-c5X (MBP; 10  $\mu$ g); 6, cell extracts of *E. coli* harboring pMALdTetR (MBP-dTetR; 10  $\mu$ g); 7, cell extracts of *E. coli* harboring pMALdMarR (MBP-dMarR; 10  $\mu$ g); 8, cell extracts of *E. coli* harboring pMALLigS (MBP-LigS; 10  $\mu$ g).

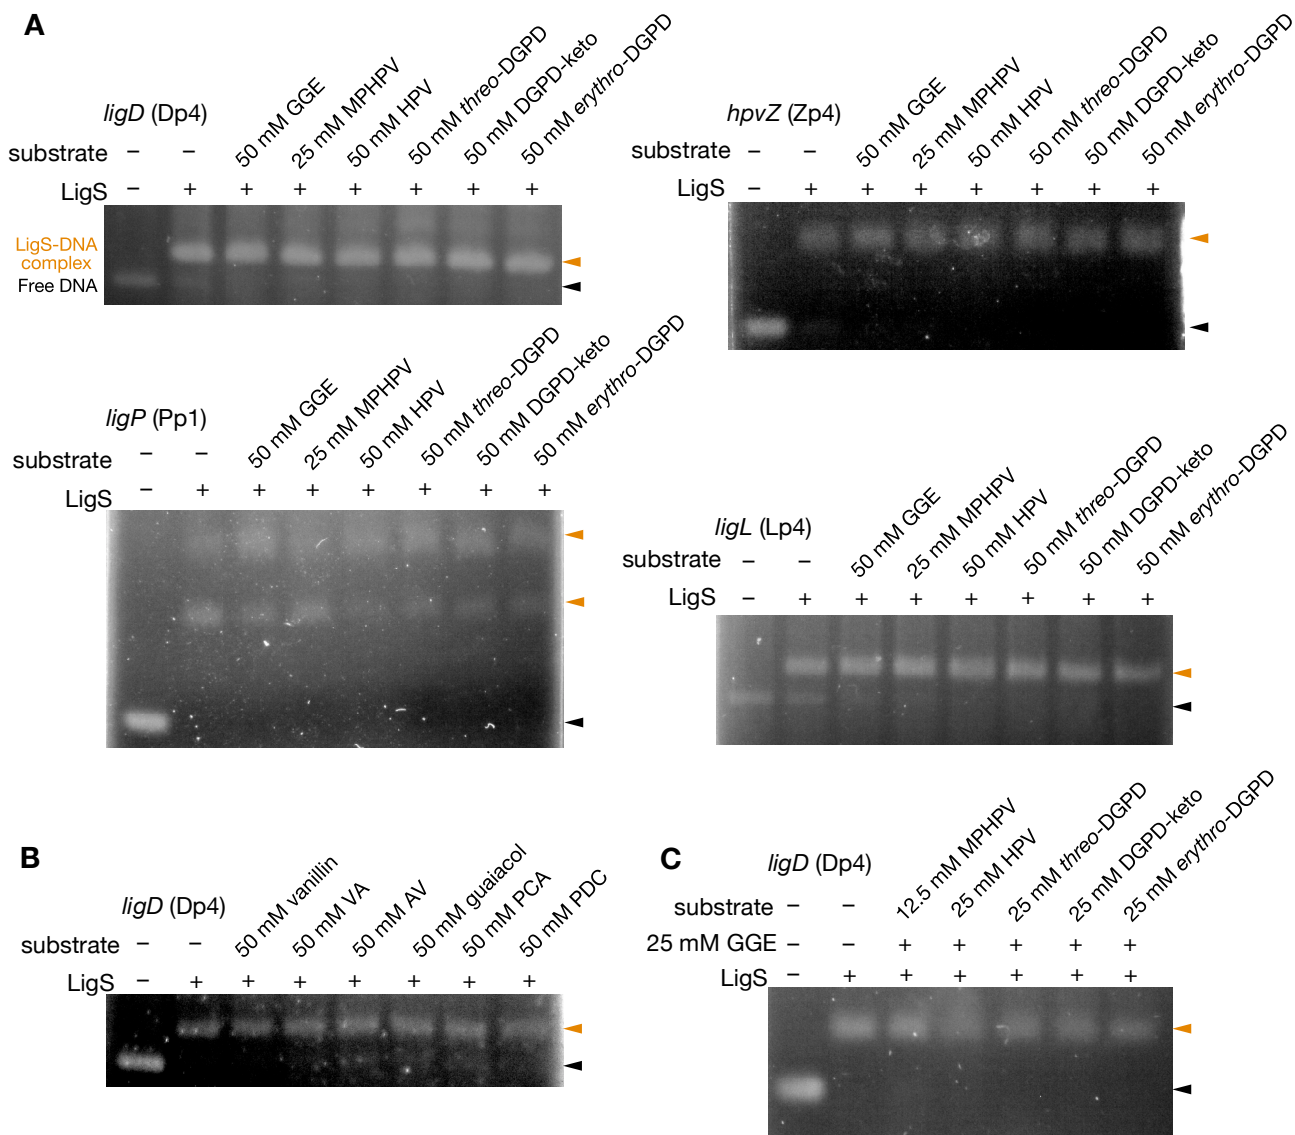

**Fig. S7. Search for effector molecules of LigS.**

(A) EMSAs of LigS (100–1000 nM) binding to Dp4, Lp4, Pp1, and Zp4 (40 fmol) in the presence of GGE, DGPD, and their metabolites. (B) EMSAs of LigS (100 nM) binding to Dp4 (40 fmol) in the presence of downstream metabolites. (C) EMSAs of LigS (100 nM) binding to Dp4 (40 fmol) in the presence of GGE plus MPHPV, HPV, *threo*-DGPD, DGPD-keto, or *erythro*-DGPD. Abbreviations: VA, vanillic acid; AV, acetovanillone; PCA, protocatechuic acid; PDC, 2-pyrone-4,6-dicarboxylic acid; HPV,  $\beta$ -hydroxypropiovanillone. Each probe was incubated in the presence (+) and absence (-) of purified LigS.

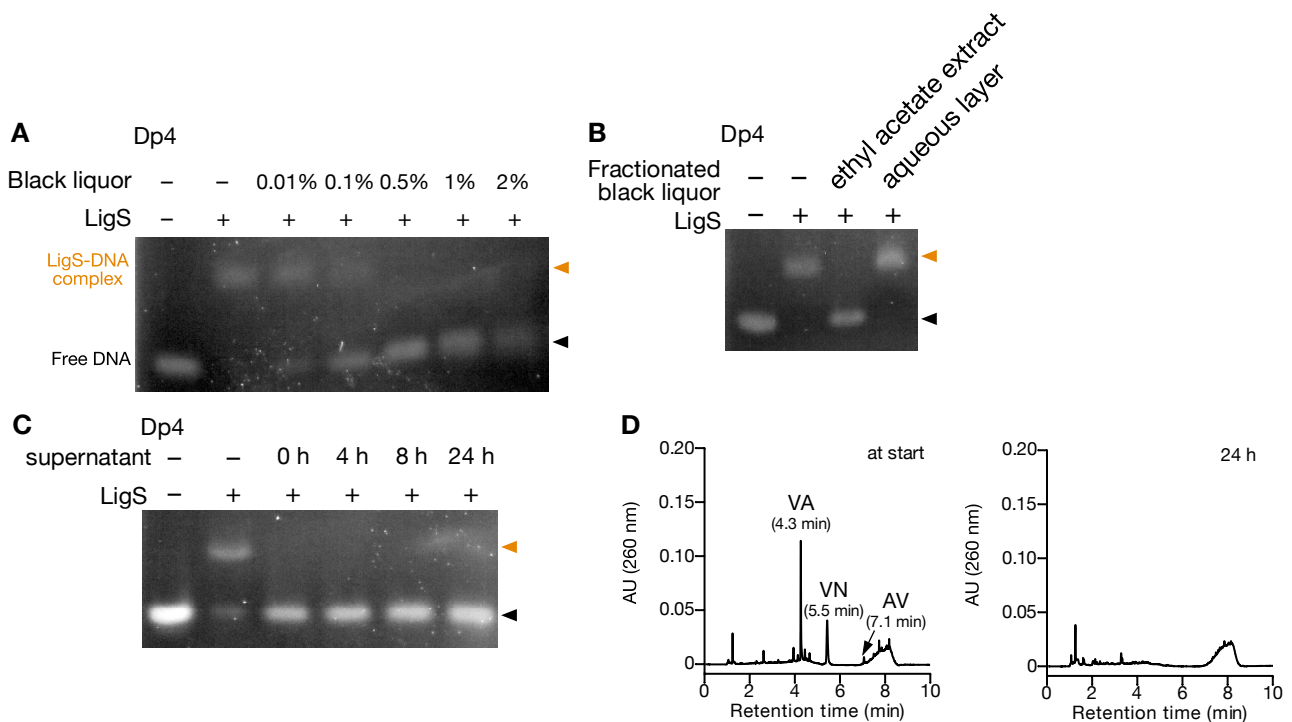

**Fig. S8. Search for effector molecules of LigS from black liquor.**

(A) EMSAs of LigS (100 nM) binding to Dp4 (40 fmol) in the presence of neutralized black liquor. (B) EMSAs of LigS (100 nM) binding to Dp4 (40 fmol) in the presence of ethyl acetate extract of black liquor and aqueous layer after ethyl acetate extraction. (C) EMSAs of LigS (100 nM) binding to Dp4 (40 fmol) in the presence of black liquor incubated with SYK-6 for 4, 8, and 24 h. Each probe was incubated with (+) or without (-) purified LigS. (D) HPLC analysis of black liquor incubated with SYK-6 for 24 h. SYK-6 cells were incubated with 5% neutralized black liquor in Wx-SEMP. Portions of the culture were collected at the start and 24 h and analyzed using HPLC. HPLC analysis was performed with the ACQUITY UPLC system (Waters). The sample solution was filtered through a PTFE filter (Captiva Econofilter, Agilent) with a pore size of 0.20  $\mu\text{m}$  and using CORTECS UPLC T3 column (particle size, 1.6  $\mu\text{m}$ ; 2.1  $\times$  150 mm, Waters). The mobile phase was a mixture of solution A (acetonitrile containing 0.1% formic acid) and B (water containing 0.1% formic acid) under the following conditions: 0–3.0 min, linear gradient from 1 to 20% A; 3.0–5.0 min, decreasing gradient from 20 to 7% A; 5.0–6.1 min, linear gradient from 7 to 30% A; 6.1–7.1 min, linear gradient from 30 to 50% A; 7.1–7.5 min, decreasing gradient from 50 to 1% A; 7.5–10 min, 1% A. The flow rate was 0.3 mL/min, and the column temperature was 40°C. Abbreviations: VA, vanillic acid; VN, vanillin; AV, acetovanillone.

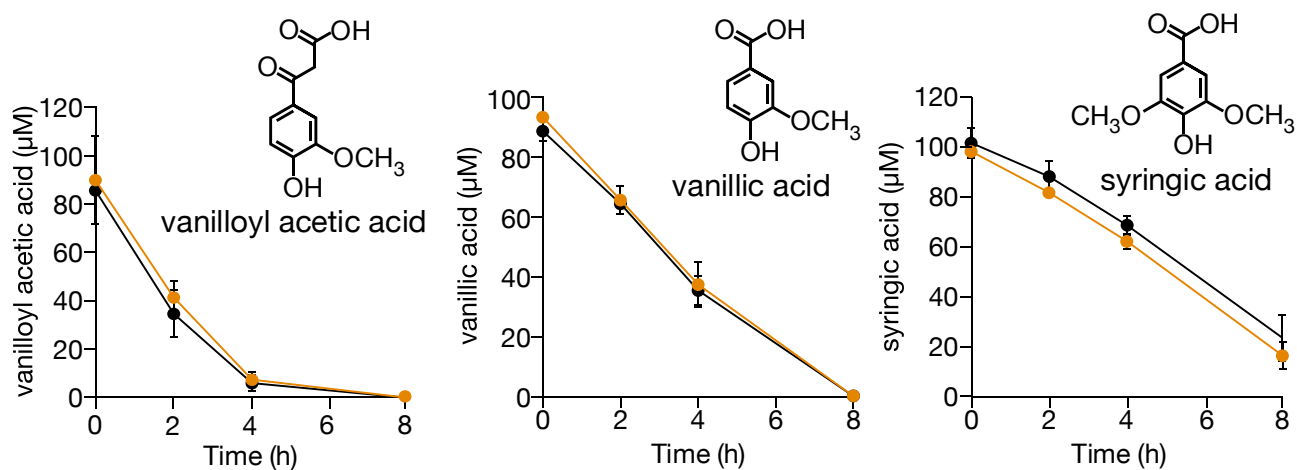

**Fig. S9. Conversion of vanilloyl acetic acid, vanillic acid, and syringic acid by resting cells of SYK-6 and  $\Delta ligS$ .**

Cells of SYK-6 (black) and  $\Delta ligS$  (orange) with an  $OD_{600}$  of 0.5 vanilloyl acetic acid and 1.0 (vanillic acid and syringic acid), respectively, were incubated with 100  $\mu M$  vanilloyl acetic acid, vanillic acid, and syringic acid.

## References

1. Y. Katayama, S. Nishikawa, M. Nakamura, N. Morohoshi, T. Haraguchi, K. Yano and M. Yamasaki, *Mokuzai Gakkaishi*, 1987, **33**, 77-79.
2. R. Kato, K. Maekawa, S. Kobayashi, S. Hishiyama, R. Katahira, M. Nambo, Y. Higuchi, E. Kuatsjah, G. T. Beckham, N. Kamimura and E. Masai, *Appl Environ Microbiol*, 2023, **89**, e0017123.
3. K. Mori, N. Kamimura and E. Masai, *Appl Microbiol Biotechnol*, 2018, **102**, 4807-4816.
4. F. W. Studier and B. A. Moffatt, *J Mol Biol*, 1986, **189**, 113-130.
5. F. Bolivar and K. Backman, *Methods Enzymol*, 1979, **68**, 245-267.
6. D. H. Figurski and D. R. Helinski, *Proc Natl Acad Sci U S A*, 1979, **76**, 1648-1652.
7. A. Kaczmarczyk, J. A. Vorholt and A. Francez-Charlot, *Appl Environ Microbiol*, 2012, **78**, 3774-3777.
8. E. Kuatsjah, M. Zahn, X. Chen, R. Kato, D. J. Hitchen, M. O. Konev, R. Katahira, C. Orr, A. Wagner, Y. Zou, S. J. Haugen, K. J. Ramirez, J. K. Michener, A. R. Pickford, N. Kamimura, E. Masai, K. N. Houk, J. E. McGeehan and G. T. Beckham, *Proc Natl Acad Sci U S A*, 2023, **120**, e2212246120.
9. J. M. Blatny, T. Brautaset, H. C. Winther-Larsen, P. Karunakaran and S. Valla, *Plasmid*, 1997, **38**, 35-51.
